# Supplementary material
Source: publisher figshare collection journal article supplement (https://sage.figshare.com/ndownloader/files/14376053)

A Age of participants

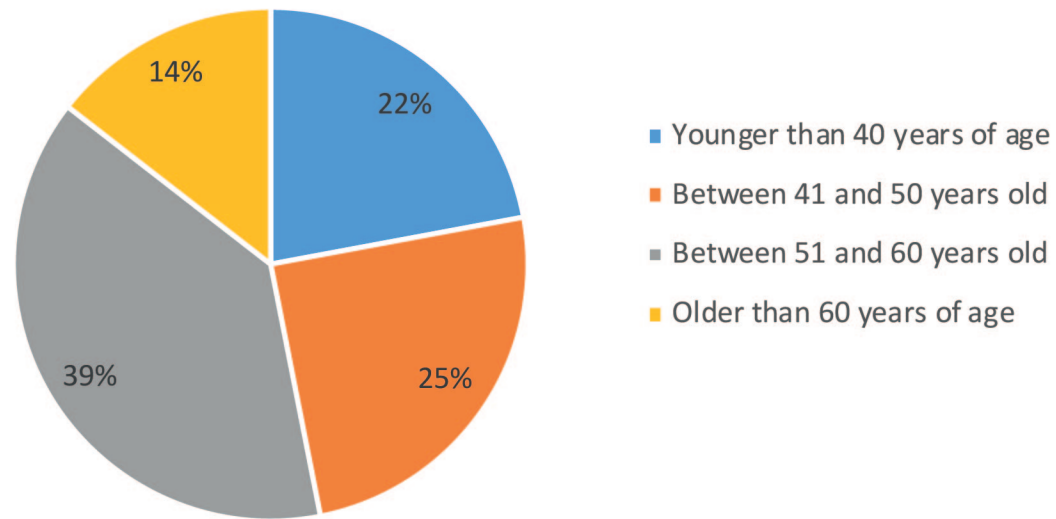

B Clinical experience of participants

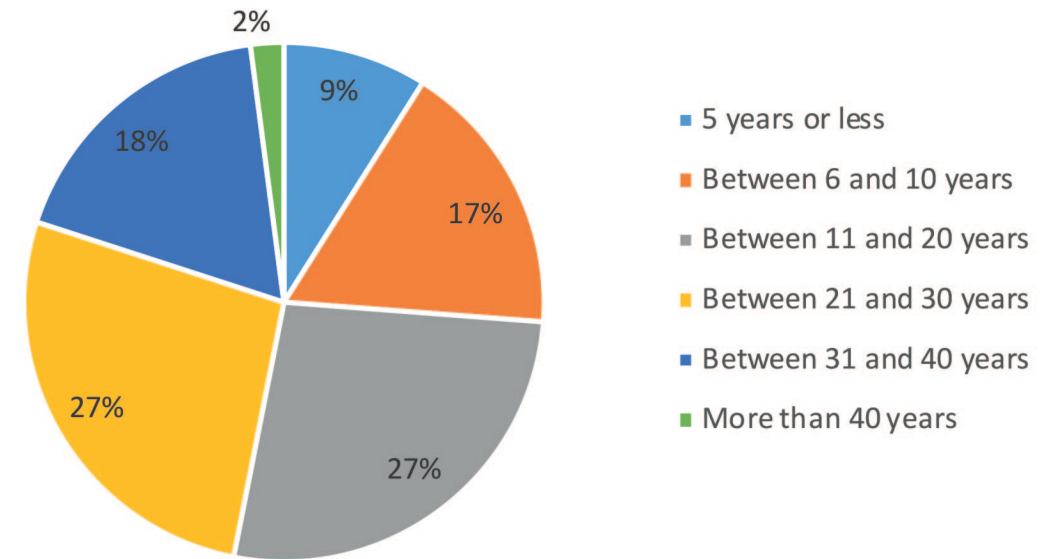

C Amount of lupus patients

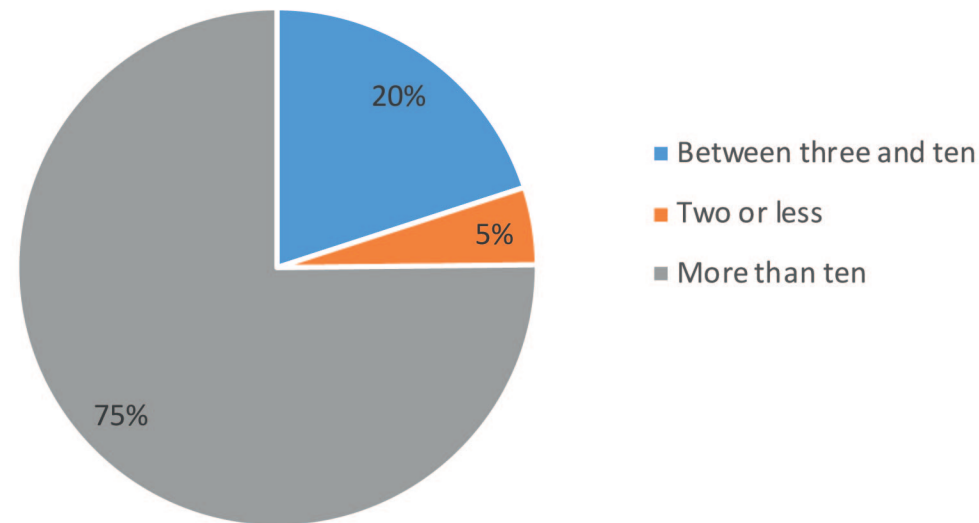

D Subspecialty of participant

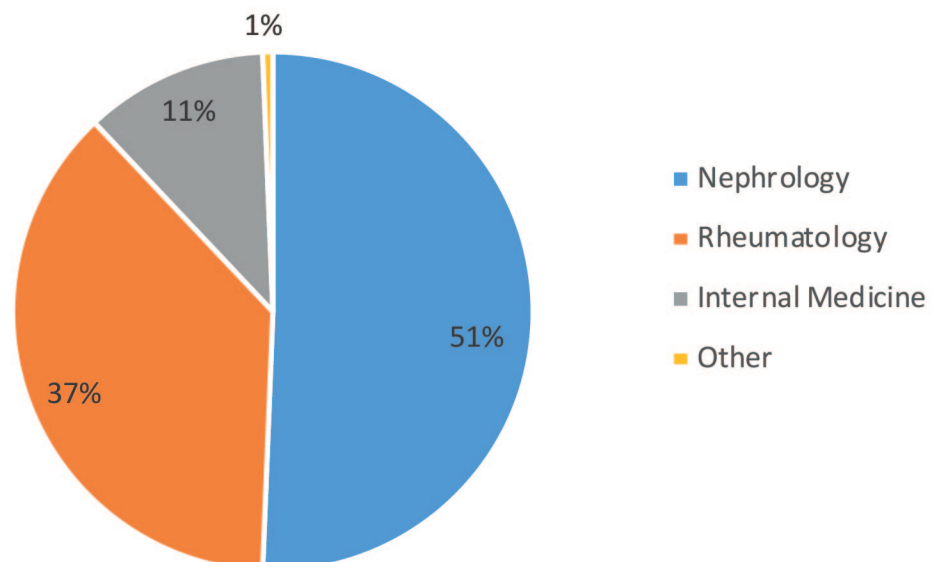

E Country of practice

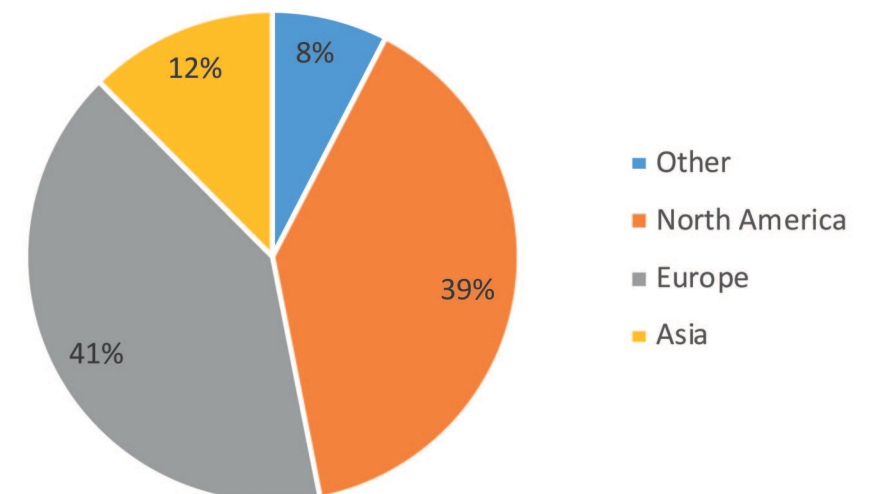

Supplement: Supplementary file 1 [file 14376053]
